# **Distinct structure-function relationships across cortical regions and connectivity scales in the rat brain**

***Running title: Structure-function relationships across rat brain***

Milou Straathof <sup>1 \*</sup>, Michel R.T. Sinke <sup>1</sup>, Theresia J.M. Roelofs <sup>1,2</sup>, Erwin L.A. Blezer <sup>1</sup>, R. Angela Sarabdjitsingh <sup>2</sup>, Annette van der Toorn <sup>1</sup>, Oliver Schmitt <sup>3</sup>, Willem M. Otte <sup>1,4</sup> & Rick M. Dijkhuizen <sup>1 \*</sup>

<sup>1</sup> *Biomedical MR Imaging and Spectroscopy Group, Center for Image Sciences, University Medical Center Utrecht and Utrecht University, Utrecht, The Netherlands.*

<sup>2</sup> *Department of Translational Neuroscience, UMC Utrecht Brain Center, University Medical Center Utrecht and Utrecht University, Utrecht, The Netherlands.*

<sup>3</sup> *Department of Anatomy, University of Rostock, Rostock, Germany.*

<sup>4</sup> *Department of Pediatric Neurology, UMC Utrecht Brain Center, University Medical Center Utrecht and Utrecht University, Utrecht, The Netherlands.*

**\* Corresponding author**

Milou Straathof

Email: [M.Straathof-2@umcutrecht.nl](mailto:M.Straathof-2@umcutrecht.nl)

Rick M. Dijkhuizen

Email: [R.M.Dijkhuizen@umcutrecht.nl](mailto:R.M.Dijkhuizen@umcutrecht.nl)

## Abstract

An improved understanding of the structure-function relationship in the brain is necessary to know to what degree structural connectivity underpins abnormal functional connectivity seen in many disorders. We integrated high-field resting-state fMRI-based functional connectivity with high-resolution macro-scale diffusion-based and meso-scale neuronal tracer-based structural connectivity, to obtain an accurate depiction of the structure-function relationship in the rat brain. Our main goal was to identify to what extent structural and functional connectivity strengths are correlated, macro- and meso-scopically, across the cortex. Correlation analyses revealed a positive correspondence between functional connectivity and macro-scale diffusion-based structural connectivity, but no correspondence between functional connectivity and meso-scale neuronal tracer-based structural connectivity. Locally, strong functional connectivity was found in two well-known resting-state networks: the sensorimotor and default mode network. Strong functional connectivity within these networks coincided with strong short-range intrahemispheric structural connectivity, but with weak heterotopic interhemispheric and long-range intrahemispheric structural connectivity. Our study indicates the importance of combining measures of connectivity at distinct hierarchical levels to accurately determine connectivity across networks in the healthy and diseased brain. Distinct structure-function relationships across the brain can explain the organization of networks and may underlie variations in the impact of structural damage on functional networks and behavior.

**Keywords:** Diffusion MRI, functional connectivity, neuronal tracers, resting-state fMRI, structural connectivity,

The brain is a complex organ that can be regarded as a structural and functional network of interacting regions at the micro-, meso- and macroscopic level. At the macro-scale, whole-brain functional networks can be non-invasively mapped with resting-state functional MRI (resting-state fMRI). In resting-state fMRI data the inter-regional temporal correlations of spontaneous low-frequency blood oxygenation level-dependent (BOLD) fluctuations reflect functional connectivity<sup>1,2</sup>. Based on clusters of functionally connected regions, various resting-state networks have been identified, such as the default mode network<sup>3</sup>. These networks have been related to behavioral functioning in health and disease, and abnormalities partially explain pathophysiological processes and disease progression<sup>4-6</sup>.

The exact nature of functional connectivity is nonetheless not yet fully established. Since functional connectivity measured with resting-state fMRI relies on synchronous BOLD signals, understanding functional connectivity starts with understanding the origin of BOLD signals. The BOLD signal captures hemodynamic changes, such as blood flow, in response to neural activity. Although it is clear that BOLD signals reflect aspects of neural responses, it is still unclear which processes are the main contributors, i.e. excitation or inhibition, local field potentials, action potentials or multi-unit activity<sup>7-9</sup>. We know from primate and rodent studies that spontaneous BOLD fluctuations match with slow fluctuations in neuronal activity<sup>10-12</sup>. Moreover, in humans, BOLD signal fluctuations are related to slow cortical potentials and gamma band-limited power<sup>13</sup>. Still, the underlying structure of functional connectivity remains largely unknown. Since functional connectivity is found between adjacent and remote brain areas, short- and long-distance structural connections seem essential. Structural connectivity can be measured non-invasively with diffusion MRI and invasively with neuronal tracers. Diffusion-based tractography enables reconstruction of whole-brain macro-scale structural networks, by indirectly inferring the direction and strength of large white matter tracts from the diffusion of water<sup>14,15</sup>. In contrast, neuronal tracers use the transport mechanisms of cells to label existing mono- or polysynaptic connections. Tracers thus provide a direct and accurate measure of the directionality and strength at the meso-scale of individual axonal projections<sup>16</sup>.

Functional connectivity strength correlates with both diffusion- and neuronal tracer-based structural connectivity strength at the whole-brain level <sup>17,18</sup>; for an overview see <sup>19</sup>. However, different regions and connections display different structure-function relationships <sup>20–22</sup>. Identifying where and to what extent structural and functional connectivity strengths correlate will help to understand how brain networks are organized, and why functional abnormalities in brain disorders are related to characteristic patterns of disconnection or reorganization. So far, most studies have compared functional connectivity with structural connectivity measured at either the macro-scale or meso-scale, and thereby did not capture all aspects of structural connectivity. In addition, studies that applied diffusion MRI are hampered by the fact that a diffusion-based structural network is a suboptimal reconstruction of macro-scale axonal projections <sup>23–26</sup>. More accurate assessment of the structure-function relationships requires integration of functional connectivity with both macro-scale diffusion- and meso-scale neuronal tracer-based structural measures. Distinct structure-function relationships may be present at these different hierarchical levels <sup>27</sup>. Rodents are excellent species to study these relationships as resting-state fMRI and diffusion MRI-based tractography are feasible in rodents <sup>28</sup> and comprehensive rodent databases of neuronal tracer-based structural connectivity are available as well <sup>29,30</sup>.

In this study we combined high-field resting-state fMRI-based functional connectivity measurements and diffusion- as well as neuronal tracer-based structural connectivity measurements from the rat brain to spatially map the structure-function relationship at the macro- and meso-scale. Our main goal was to identify to what extent structural and functional connectivity strength are correlated, macro- and meso-scopically, across the rat brain, which could explain differences in the functional significance of connections and their contribution to network dysfunction in brain disorders. We distinguished interhemispheric and intrahemispheric connections, as well as specific functional networks (sensorimotor or default mode network).

## Materials and Methods

### Ethics statement

All experiments were approved by the Committee for Animal Experiments of the University Medical Center Utrecht, The Netherlands, and were conducted in agreement with European regulations (Guideline 86/609/EEC) and Dutch laws ('Wet op de Dierproeven', 1996).

### Animals

#### In vivo resting-state functional connectivity

Resting-state functional connectivity was measured in twelve healthy adult male Wistar rats with a weight of  $479 \pm 44$  g (mean  $\pm$  standard deviation (SD)), which were group-housed and used for an earlier described study<sup>31</sup>. All animals had *ad libitum* access to food and water and were housed under the same environmental conditions (temperature 22-24° and 12 h light/dark cycle with lights on at 7:00 AM).

#### Post-mortem diffusion-based structural connectivity

Diffusion-based structural connectivity was measured in ten healthy adult male Wistar rats with an age of around twelve weeks. These animals were previously used in another study<sup>32</sup> and group-housed under standard environmental conditions (12h light/dark cycle with lights on at 7:00 AM). Animals were sacrificed by an intraperitoneal pentobarbital injection followed by transcatheterial perfusion-fixation with 4% paraformaldehyde in phosphate-buffered saline, as previously described<sup>32</sup>. We extracted the brains, while leaving them inside the skull, and placed these in a proton-free oil (Fomblin®) prior to MR imaging to minimize susceptibility artefacts.

### MRI acquisition

All MRI experiments were conducted on a 9.4T horizontal bore Varian MR system (Palo Alto, CA, USA), equipped with a 400 mT/m gradient coil (Agilent).

### *In vivo resting-state functional connectivity*

Before MRI, the animals were anesthetized (with 4% of isoflurane in air for induction). Endotracheal intubation was performed to mechanically ventilate the rats with 1.5% of isoflurane in a mixture of air and O<sub>2</sub> (4:1). End-tidal CO<sub>2</sub> was continuously monitored with a capnograph (Microcap, Oridion Medical 1987 Ltd., Jerusalem, Israel). The animals were placed in an animal cradle and immobilized in a specially designed stereotactic holder. During MRI, a feed-back controlled heating pad ensured that the body temperature of the rats was maintained at  $37.0 \pm 1.0$  °C. Blood oxygen saturation and heart rate were monitored with a pulse-oximeter from signals recorded with an infrared sensor attached to the hind paw of the animal.

We used a home-built 90 mm diameter Helmholtz volume coil for radiofrequency transmission, and an inductively coupled 25 mm diameter surface coil for signal detection. Prior to resting-state fMRI acquisition we acquired an anatomical image for registration purposes using 3D balanced steady-state free precession (bSSFP) imaging with four phase-cycling angles (0°, 90°, 180°, 270°). The acquisition parameters were as follows: repetition time (TR) / echo time (TE) = 5/2.5 ms; flip angle = 20°; field-of-view (FOV) = 40×32×24 mm<sup>3</sup>; acquisition matrix = 160×128×96; image resolution = 250 μm isotropic. Total acquisition time = 12.5 min. Resting-state fMRI images were acquired with T<sub>2</sub><sup>\*</sup>-weighted blood oxygenation level-dependent (BOLD) single shot 3D gradient-echo Echo Planar Imaging (EPI). The acquisition parameters were as follows: TR/TE = 26.1/15 ms; flip angle = 13°; FOV = 32.4×32.4×16.8 mm<sup>3</sup>, Acquisition matrix = 54×54×28; Spatial Resolution = 600 μm isotropic. The acquisition time was 730.8 ms per volume, with a total of 800 volumes, resulting in a scan time of 9 minutes and 45 seconds.

### *Post-mortem diffusion-based structural connectivity*

For diffusion MRI we used a custom-made solenoid coil with an internal diameter of 26 mm. High spatial and angular resolution diffusion imaging (HARDI) was performed with an 8-shot 3D EPI sequence. The acquisition parameters were as follows: TR/TE = 500/32.4 ms,  $\Delta/\delta = 15/4$  ms; b-value = 3842 s/mm<sup>2</sup>; FOV = 19.2×16.2×33 mm<sup>3</sup>; Acquisition matrix = 128×108×220; Spatial resolution:

150×150×150  $\mu\text{m}^3$ . Diffusion-weighting was executed in 60 non-collinear directions on a half sphere and included five  $b_0$  non-diffusion-weighted images, with a total scan time of 8 hours.

## **MRI processing**

All MRI analyses were performed using FMRIB's Software Library (FSL) v5.0, unless otherwise stated.

### *In vivo resting-state functional connectivity*

The first twenty images of the resting-state fMRI scan were removed to ensure a steady state and the remaining images were motion-corrected to the mean volume with *MCFLIRT*<sup>33</sup> and brain-extracted with *BET*<sup>34</sup>. The six motion correction parameters were used as regressors for the resting-state fMRI signal. No global signal regression was performed. Low-frequency BOLD fluctuations were obtained by band-pass filtering between 0.01 and 0.1 Hz in *AFNI*<sup>35</sup>. Fisher's Z-transformed full correlation coefficients were calculated between the time-series for all pairs of regions of interest (see below). These Fisher's Z-transformed correlation coefficients were averaged over all rats within each dataset to obtain a group-level measurement of functional connectivity strength between our regions of interest.

### *Post-mortem diffusion-based structural connectivity*

We used single shell constrained spherical deconvolution (CSD) to construct a fiber orientation distribution (FOD) map for every rat. Next, CSD-based tractography, using the iFOD2 algorithm, was performed in MRtrix3® (<http://www.mrtrix.org/>)<sup>36,37</sup>. The iFOD2 algorithm uses 2<sup>nd</sup> order integration over adjacent orientation distributions<sup>37</sup>. Whole brain tractography was done in individual subject space using dynamic seeding, thereby generating 2.5 million streamlines with a step size of 75  $\mu\text{m}$ , an angle threshold of 40° and a FOD threshold of 0.2. The generated tractograms were filtered by *Spherical deconvolution Informed Filtering of Tracts* (SIFT)<sup>38,39</sup>. Subsequently, the connectomes were constructed by matching the filtered tractograms with a custom-built 3D model of the 5<sup>th</sup> edition

of the Paxinos and Watson rat brain atlas<sup>40,41</sup> in subject space. Regions of interest (see below) were structurally connected if one or multiple streamlines had their endpoints in both regions, where the filtered number of inter-regional streamlines was indicative of structural connectivity strength. Finally, we calculated an average weighted connectome, to obtain a group-level measurement of diffusion-based structural connectivity strength between our regions of interest.

### Regions of interest

To enable the selection of regions of interest, the mean resting-state fMRI image of each dataset was first linearly registered (*FLIRT*<sup>33,42</sup>) to the anatomical image of the same animal, followed by non-linear registration (*FNIRT*<sup>43</sup>) to a custom-built 3D model of the Paxinos and Watson rat brain atlas<sup>40,41</sup>. For diffusion MRI, the average of the non-diffusion-weighted images of each individual rat was non-linearly registered to this rat brain atlas. These registrations were used to transform 106 cortical bilateral regions into individual diffusion MRI and resting-state fMRI spaces. We only included regions of interest with sufficient assurance of spatial alignment, i.e. regions consisting of at least 8 voxels in individual resting-state fMRI space. This resulted in 82 bilateral cortical regions (Table 1).

### **Neuronal tracer-based structural connectivity**

Neuronal tracer-based structural connectivity data was extracted from the NeuroVIISAS database<sup>30</sup>. This database contains rat nervous system data from over 7860 published tract-tracing studies, describing in total 591,435 ipsi- and contralateral connections. Many of these connections are described in multiple studies, affirming the robustness of the dataset. Studies with anterograde as well as retrograde monosynaptic tracers have been included, giving directionality information about the structural connections.

We used the same regions of interest as described for the functional connectivity and diffusion-based structural connectivity analyses to extract neuronal tracer-based structural connectivity for all pairs of regions (Supplementary table 1).. The directional weight for each connection is assigned in the NeuroVIISAS database as follows: 0: no information available; 1: light/sparse connection; 2:



moderate/dense connection; 3: strong connection and 4: very strong connection. These categorical descriptors were transformed to continuous data by using a logarithmic transformation. We averaged these continuous connection weights over all studies investigating the same connection, resulting in a continuous scale for neuronal tracer-based structural connectivity between 0 and 4.

## **Experimental design and statistical analysis**

The network of 82 regions consisted of 6,724 connections, of which we removed the self-connections, resulting in a total of 6,642 connections. Only connections that existed in both the macro- and mesoscale structural connectivity datasets, meaning that they had a structural connectivity strength higher than zero in both datasets, were included for the analysis, to exclude false-positives often present in diffusion-based tractography networks<sup>24</sup>.

### *Relationship between structural and functional connectivity strength at whole-brain level*

To map the structure-function relationship globally, we performed correlation analyses between functional connectivity strength and macro-scale diffusion-based or meso-scale neuronal tracer-based structural connectivity separately. We applied a log-transformation to both structural connectivity weights because they were skewed towards smaller connectivity weight values. We calculated a Spearman rank correlation coefficient ( $\rho$ ) between functional connectivity strength and macro-scale diffusion-based or meso-scale neuronal tracer-based structural connectivity strength..

### *Relationship between structural and functional connectivity strength at connection level*

To map the level of agreement between structural and functional connectivity at connection level, we selected the strongest and weakest structural connections at both the macro- and meso-scale. The strongest structural network was defined by connections that belonged to the 25% strongest diffusion-based and 25% strongest neuronal tracer-based structural connections. The weakest structural network was defined by connections that belonged to the 25% weakest diffusion-based and 25% weakest neuronal tracer-based structural connections. By combining macro- and meso-scale structural

connectivity strengths, we selected the structural networks that were strong or weak at the level of individual axonal projections as well as at the level of large white matter bundles. This heightened the reliability of our assessment of the strength of structural connections and reduced the influence of methodological bias for specific connections.

For both the strongest and weakest structural network, we determined the 25% strongest and 25% weakest functional connections, resulting in four sub-groups of connections. Two of these sub-groups represent connections where structural and functional connectivity strength agree: strong structural and functional connectivity or weak structural and functional connectivity. The other two subgroups are connections where structural and functional connectivity strength disagree: strong structural connectivity but weak functional connectivity or weak structural connectivity but strong functional connectivity.

To determine whether these subgroups of connections share common characteristics, we determined the Euclidian distance and type of connections and regions for all connections.

Between each pair of regions, we calculated the Euclidian distance, which is the shortest distance between two points in space (i.e. in a straight line). Therefore, we determined the x, y and z coordinate in mm of the center of gravity of each region in atlas space. Subsequently, we calculated the Euclidean distance, between each pair of regions i and j, with the following formula:

$$d(i, j) = \sqrt{(x_i - x_j)^2 + (y_i - y_j)^2 + (z_i - z_j)^2}$$

We divided the included connections and regions in sub-groups based on two different criteria. First, for each connection, we identified whether it was an intrahemispheric connection, which runs between two regions in the same hemisphere, or an interhemispheric connection, which runs between two regions in different hemispheres. In addition, we subdivided the interhemispheric connections into homotopic interhemispheric connections, which run between two homologous areas

in different hemispheres and heterotopic interhemispheric connections, which run between two dissimilar areas in different hemispheres (Figure 1C).

Second, for each region of interest, we assessed whether it belonged to one of two well-described functional networks in the rat brain: the sensorimotor network or the default mode network (Figure 1C). The sensorimotor network was defined as consisting of the left and right primary and secondary motor cortex (M1 and M2), subdivisions of the primary somatosensory cortex (S1BF, S1DZ, S1FL, S1HL, S1J, S1Tr, S1ULp) and the secondary somatosensory cortex (S2)<sup>44</sup>. The default mode network was defined as consisting of the left and right medial prefrontal cortex (mPFC), the cingulate cortex (Cg1 and Cg2), the orbital cortex (VO, MO and LO), the auditory/temporal association cortex (Au1, AuD, AuV and TeA), the posterior parietal cortex (ParPD) and the retrosplenial cortex (RSd, RSGb, RSGc)<sup>45</sup>. For each connection, we determined whether the connection was within one of these functional networks, or whether it was connecting one of these functional networks with another functional network.

The analysis pipeline is illustrated in Figure 1. All statistical and descriptive analyses were performed in R (version 3.2.3)<sup>46</sup>.

## Results

Of all the possible 6,642 connections between the 82 selected regions of the cortical network, 1,175 connections (17.7% of total connections) displayed structural connectivity in both the diffusion MRI and the neuronal tracer dataset. The average Euclidean distance for all the included connections in this network was  $6.08 \pm 3.35$  mm (mean  $\pm$  standard deviation (SD)).

### *Different pathways and brain circuits display distinct structure-function relationships*

The strongest structural network at the macro- and meso-scale consisted of 107 cortical connections. These strongest structural connections were mainly intrahemispheric (93% of total connections; left: 47%, right: 46 %) with an average Euclidean distance of  $2.54 \pm 1.71$  mm (see Figure 2). The weakest structural network at the macro- and meso-scale consisted of 93 connections. Of these weakest structural connections 31% was interhemispheric and 69% was intrahemispheric (left: 32%, right: 37%), with an average distance of  $9.55 \pm 2.42$  mm (see Figure 2).

Within both the strongest and weakest cortical structural networks, we determined the 25% strongest and 25% weakest functional connections. These strongest and weakest functional connections are depicted in Figure 2. The characteristics of these subcategories of connections are summarized in Figure 3 and described below.

Connections with strong structural and functional connectivity are shown in Table 2. The average length of the connections was  $1.34 \pm 0.69$  mm. Eighty-eight percent of these strongest connections was intrahemispheric (left: 50%; right: 38%). a Sixty-two percent of the connections were part of the sensorimotor network. The homotopic connection between the left and right medial prefrontal cortex, which is part of the default mode network, was also one of the identified strongest connections.

Table 3 shows the connections that we identified as belonging to the 25% weakest structural and functional connections. The average length of the weakest structural and functional connections was  $10.84 \pm 2.09$  mm. The identified connections included 30% heterotopic interhemispheric and 70%

intrahemispheric (left: 44%, right: 26 %) connections, and were mainly between frontal cortices, parahippocampal areas and the retrosplenial cortex. Sixty-one percent of the connections connected the default mode network with another functional network.

Table 4 shows connections with strong structural but weak functional connectivity. All these connections were intrahemispheric (50% right; 50% left), of which the average Euclidean distance between regions was  $3.23 \pm 1.64$  mm. Many of these connections were between parahippocampal areas and the insular cortex or auditory cortex, and within the insular cortex.

The connections belonging to 25% strongest functional but 25% weakest structural connections are shown in Table 5. The average Euclidean length of the connections was  $8.67 \pm 1.78$  mm and 35% were heterotopic interhemispheric, all of which were part of the sensorimotor network. Fifty-two percent of the connections resided within the sensorimotor network or between the sensorimotor network and another network, of which 42% connected the sensorimotor with the default mode network, and 43% of the connections was between the default mode network and another functional network.

### ***Global correlation between structural and functional connectivity depends on method and scale***

Functional connectivity strength was positively correlated with diffusion-based structural connectivity strength in cortical connections ( $\rho=0.41$ ;  $p<0.0001$ ; Figure 4A). For the same cortical connections, functional connectivity strength did not correlate with neuronal tracer-based structural connectivity strength ( $\rho=0.04$ ,  $p=0.14$ ; Figure 4B).

## Discussion

Our study on the rat brain shows that cortical brain networks are characterized by functional connectivity strengths, as measured with resting-state fMRI, that partly associate with macro-scale diffusion-based structural connectivity strength but not associate with meso-scale neuronal tracer-based structural connectivity strength. At a more local level we found that strong functional connectivity in the sensorimotor and default mode network matched with strong structural connectivity of intrahemispheric connections but was accompanied by weak structural connectivity of interhemispheric connections. .

### *Distinct global structure-function relationships across different hierarchical levels of structural connectivity*

The partial positive correspondence between functional connectivity and diffusion-based structural connectivity strength in the rat brain is in line with structure-function relationships found in humans <sup>19</sup>. However, we did not find a correlation between functional connectivity and meso-scale neuronal tracer-based structural connectivity strength. One previous study investigated this relationship at the meso-scale in rats and reported a positive structure-function correlation ( $r=0.48$ ) <sup>47</sup>. However, this study did not include essential interhemispheric connections. Interhemispheric connections are known to have lower structure-function relationships <sup>48</sup>, which may be explained by long inter-regional distances, sparser interhemispheric connectivity or involvement of polysynaptic or indirect connections <sup>49</sup>. Distinct structure-function relationships at the structural macro- and meso-scale have already been demonstrated in a study combining datasets in humans (functional and diffusion-based structural connectivity) and macaques (neuronal tracer-based structural connectivity) <sup>27</sup>. However, the authors could not disentangle whether these distinct relationships were due to species differences or due to different measures of structural connectivity. Since we compared all three measures in the same species, (dis)agreement between structural and functional connectivity most likely reflects topological differences in the structure-function relationship across different hierarchical levels.

Beside being measurements at different hierarchical levels, another important difference between macro-scale diffusion-based and meso-scale neuronal tracer-based structural connectivity is the directionality information available in the data. Whereas diffusion-based structural connectivity does not provide directionality information, meaning that all connections are considered to be fully reciprocal, neuronal tracer-based structural connectivity does provide this directionality information. Since resting-state functional connectivity is also directionless, the correlation of functional connectivity with diffusion-based structural connectivity may be higher than with neuronal tracer-based structural connectivity. In addition, the correlation between functional connectivity and diffusion-based structural connectivity may also be explained by the fact that both connectivity measures are determined with the same measurement tool, i.e. MRI.

*Strong functional connectivity in robust resting-state networks is supported by strong short-range intrahemispheric connections*

The sensorimotor and default mode network are robustly established resting-state networks in the rodent brain<sup>44,50</sup>, which was corroborated by our finding of strong functional connectivity in or between these networks. We also observed strong short-range intrahemispheric structural connections at meso- and macro-scale in these networks. Strong reciprocal structural connections have previously been shown between ipsilateral sensorimotor cortices, measured with neuronal tracers<sup>51-53</sup>, and between default mode network regions, measured with diffusion MRI<sup>54,55</sup>. In comparison, in the current study we found that heterotopic interhemispheric structural connections in the sensorimotor network and long-range intrahemispheric structural connections between the default mode network and other functional networks were weak at both the macro- and the meso-scale. Since both connection types were between areas located far apart from each other, this observation may reflect the difficulties of diffusion-based tractography to reconstruct long-distance connections<sup>56</sup>, and the distance-dependence of neuronal tracer-based structural connectivity strength<sup>57</sup>. Our data point out that the distance-dependence of structural connectivity strength, as determined from diffusion MRI or neuronal tracing, influences measurements of structure-function relationships. This should be taken into account in studies on the relation between structural and functional connectivity. However, weak

heterotopic interhemispheric connectivity may also reflect the smaller role these connections play in functional brain organization as compared to homotopic interhemispheric connections<sup>58,59</sup>. Interestingly, strong functional connectivity in homotopic interhemispheric connections within the sensorimotor network was not accompanied by strong structural connectivity, despite the presence of a large bundle of neuronal fibers, i.e. the corpus callosum, connecting the two hemispheres. This may be a result of our approach of only including connections that exhibit macro- and meso-scale structural connectivity. Homotopic interhemispheric connections in the sensorimotor network were included in the 25% strongest meso-scale neuronal tracer-based structural network, but not in the 25% strongest macro-scale diffusion-based structural network. Therefore, we limit our conclusions to connections with matching macro- and meso-scale structural connectivities, while other structure-function relationships may exist in connections where macro- and meso-scale structural connectivity do not match.

#### *Implications of different structure-function relationships across the brain in health and disease*

We have shown that different structure-function relationships exist in different cortical connections of the rat brain, in line with a previous study reporting that 25% of valid structural connections are very weak functional connections<sup>60</sup>. Different structure-function relationships can have implications for brain functioning and behavior. Healthy brain functioning relies on a balance between segregation and integration of neuronal communications<sup>61,62</sup>. Structure-function relationships have been shown to be stronger when functional networks are in an integrated state, compared to a segregated state<sup>63</sup>. In another study, white matter integrity was associated with BOLD signal complexity in local connections (structure-function agreement) but not in distributed connections (structure-function disagreement)<sup>64</sup>. This suggests that information integration relies on a strong structure-function relationship, whereas weak structure-function relationships are implied in segregation.

Next to the implication of structure-function relationships on healthy brain functioning, structure-function relationships may (partly) determine the functional effects of structural damage to



the brain. Intuitively, it may be deduced that structural damage to connections with strong structure-function relationships will have severer functional consequences than structural damage to connections with weak structure-function relationships. Novel algorithms may enable us to predict the functional effects of specific structural damage<sup>65</sup>. Alterations and preservations of structural and functional connectivity in human patients, and in animal models of neurological and psychiatric diseases, can provide insights into the impact of structure-function couplings on outcome. For example, after stroke significant changes in structural and functional connectivity have been measured in the remaining intact sensorimotor network in rodents<sup>66–68</sup> and humans<sup>69–71</sup>. Chronically after experimental stroke in rats, structural and functional connectivity changes were related intrahemispherically –on the side of the stroke lesion– while this was not evident for interhemispheric connections<sup>66</sup>. This may be explained by a stronger structure-function agreement in intrahemispheric sensorimotor connections as compared to interhemispheric sensorimotor connections, as we found in the current study.

A strength of the current study is the inclusion of three different measures of connectivity within a single species. Comparing functional connectivity against macro-scale diffusion-based as well as meso-scale neuronal tracer-based structural connectivity in rats enabled the investigation of structure-function relationships across hierarchical levels. In addition, by including both diffusion- and neuronal tracer-based structural connectivity measures, we could avoid inclusion of false positives that are often present in diffusion-based structural networks<sup>24,25,72,73</sup>. A reliable structural network of the rat brain was created by only selecting connections present in both diffusion- and neuronal tracer-based structural networks. The relationship between diffusion-based structural connectivity and resting-state functional connectivity may have been higher when both measures would have been acquired in the same rat. However, neuronal tracer-based structural connectivity was acquired from many different groups of rats. Therefore, we also measured diffusion-based structural connectivity in a separate group of rats, to prevent inappropriate comparison with potentially higher within-subject correlations. A limitation could be the restriction of our assessments to monosynaptic

connections. In addition, resting-state functional connectivity was determined under anesthesia, which influences functional connectivity measures<sup>74</sup> and possibly affects the structure-function relationship.

In conclusion, we demonstrated a correlation between functional connectivity and diffusion-based structural connectivity, but no correlation between functional connectivity and neuronal tracer-based structural connectivity in the rat cortex. These distinct structure-function relationships may be due to different hierarchical levels of measurement or directionality information available in the data. In addition, the structure-function relationship varies across cortical regions in the rat brain. Characteristics of the used techniques, such as distance-dependency, affect where structural and functional networks (dis)agree. Conclusions about connectivity based on a single technique may therefore be biased. This shows the importance of combining different complementary measures of connectivity at distinct hierarchical levels to accurately determine connectivity across networks in the healthy and diseased brain.

## **Funding**

This work was supported by the Netherlands Organization for Scientific Research (dr. R.M. Dijkhuizen: NWO-VICI 016.130.662, dr. W.M. Otte: NWO-VENI 016.168.038), and the Dutch Brain Foundation (dr. W.M. Otte: F2014(1)-06). The research leading to these results has received funding from the European Community's Seventh Framework Program (FP7/2007-2013) TACTICS under grant agreement no. 278948.

## References

1. Biswal, B., Yetkin, F., Haughton, V. & Hyde, J. Functional connectivity in the motor cortex of resting human brain using echo-planar MRI. *Magn. Reson. Med.* **34**, 537–541 (1995).
2. Fox, M. D. & Raichle, M. E. Spontaneous fluctuations in brain activity observed with functional magnetic resonance imaging. *Nat. Rev. Neurosci.* **8**, 700–711 (2007).
3. Greicius, M. D., Krasnow, B., Reiss, A. L. & Menon, V. Functional connectivity in the resting brain: A network analysis of the default mode hypothesis. *Proc. Natl. Acad. Sci. U. S. A.* **100**, 253–258 (2003).
4. van den Heuvel, M. P. & Hulshoff Pol, H. E. Exploring the brain network: A review on resting-state fMRI functional connectivity. *Eur. Neuropsychopharmacol.* **20**, 519–534 (2010).
5. Zhang, D. & Raichle, M. E. Disease and the brain's dark energy. *Nat. Rev. Neurol.* **6**, 15–28 (2010).
6. Raichle, M. E. The restless brain: how intrinsic activity organizes brain function. *Philosophical Trans. R. Soc. B* **370**, 20140172 (2015).
7. Logothetis, N. K. What we can do and what we cannot do with fMRI. *Nature* **453**, 869–878 (2008).
8. Logothetis, N. K., Pauls, J., Augath, M., Trinath, T. & Oeltermann, A. Neurophysiological investigation of the basis of the fMRI signal. *Nature* **412**, 150–157 (2001).
9. Logothetis, N. K. & Wandell, B. A. Interpreting the BOLD signal. *Annu. Rev. Physiol.* **66**, 735–769 (2004).
10. Shmuel, A. & Leopold, D. A. Neuronal Correlates of Spontaneous Fluctuations in fMRI Signals in Monkey Visual Cortex: Implications for Functional Connectivity at Rest. *Hum. Brain Mapp.* **29**, 751–761 (2008).
11. Magri, C., Schridde, U., Murayama, Y., Panzeri, S. & Logothetis, N. K. The Amplitude and Timing of the BOLD Signal Reflects the Relationship between Local Field Potential Power at Different Frequencies. *J. Neurosci.* **32**, 1395–1407 (2012).
12. Pan, W.-J. *et al.* Broadband Local Field Potentials Correlate with Spontaneous Fluctuations in

- Functional Magnetic Resonance Imaging Signals in the Rat Somatosensory Cortex Under Isoflurane Anesthesia. *Brain Connect.* **1**, 119–131 (2011).
13. He, B. J., Snyder, A. Z., Zempel, J. M., Smyth, M. D. & Raichle, M. E. Electrophysiological correlates of the brain's intrinsic large-scale functional architecture. *Proc. Natl. Acad. Sci.* **105**, 16039–16044 (2008).
14. Basser, P. J., Mattiello, J. & LeBihan, D. MR Diffusion Tensor Spectroscopy and Imaging. *Biophys. J.* **66**, 259–267 (1994).
15. Turner, R. *et al.* Echo-Planar Imaging of Intravoxel Incoherent Motion. *Radiology* **177**, 407–414 (1990).
16. Heimer, L. & Robards, M. J. *Neuroanatomical Tract-Tracing Methods*. (Plenum Press, 1981). doi:10.1007/978-1-4613-3189-6
17. Honey, C. J. *et al.* Predicting human resting-state functional connectivity from structural connectivity. *Proc. Natl. Acad. Sci. U. S. A.* **106**, 2035–2040 (2009).
18. Miranda-Dominguez, O. *et al.* Bridging the Gap between the Human and Macaque Connectome: A Quantitative Comparison of Global Interspecies Structure-Function Relationships and Network Topology. *J. Neurosci.* **34**, 5552–5563 (2014).
19. Straathof, M., Sinke, M. R., Dijkhuizen, R. M., Otte, W. M. & on behalf of the TACTICS consortium. A systematic review on the quantitative relationship between structural and functional network connectivity strength in mammalian brains. *J. Cereb. Blood Flow Metab.* **39**, 189–209 (2019).
20. Grandjean, J., Zerbi, V., Balsters, J. H., Wenderoth, N. & Rudin, M. Structural Basis of Large-Scale Functional Connectivity in the Mouse. *J. Neurosci.* **37**, 8092–8101 (2017).
21. Zimmermann, J. *et al.* Structural Architecture Supports Functional Organization in the Human Aging Brain at a Regionwise and Network Level. *Hum. Brain Mapp.* **37**, 2645–2661 (2016).
22. Wang, L., Su, L., Shen, H. & Hu, D. Decoding Lifespan Changes of the Human Brain Using Resting-State Functional Connectivity MRI. *PLoS One* **7**, e44530 (2012).
23. Thomas, C. *et al.* Anatomical accuracy of brain connections derived from diffusion MRI tractography is inherently limited. *Proc. Natl. Acad. Sci. U. S. A.* **111**, 16574–16579 (2014).

24. Maier-Hein, K. H. *et al.* The challenge of mapping the human connectome based on diffusion tractography. *Nat. Commun.* **8**, 1349 (2017).
25. Sinke, M. R. T. *et al.* Diffusion MRI-based cortical connectome reconstruction: dependency on tractography procedures and neuroanatomical characteristics. *Brain Struct. Funct.* **223**, 2269–2285 (2018).
26. Schilling, K. G. *et al.* Limits to anatomical accuracy of diffusion tractography using modern approaches Diffusion MRI fiber tractography is widely used to probe the structural connectivity of the. *bioRxiv* 1–23 (2018). doi:10.1101/392571
27. Reid, A. T. *et al.* A cross-modal, cross-species comparison of connectivity measures in the primate brain. *Neuroimage* **125**, 311–331 (2016).
28. Dijkhuizen, R. M. & Nicolay, K. Magnetic resonance imaging in experimental models of brain disorders. *J. Cereb. Blood Flow Metab.* **23**, 1383–1402 (2003).
29. Noori, H. R. *et al.* A multiscale cerebral neurochemical connectome of the rat brain. *PLoS Biol.* **15**, e2002612 (2017).
30. Schmitt, O. & Eipert, P. NeuroVIISAS: Approaching Multiscale Simulation of the Rat Connectome. *Neuroinformatics* **10**, 243–267 (2012).
31. Roelofs, T. J. M. *et al.* A novel approach to map induced activation of neuronal networks using chemogenetics and functional neuroimaging in rats: A proof-of-concept study on the mesocorticolimbic system. *Neuroimage* **156**, 109–118 (2017).
32. Sarabdjitsingh, R. A., Loi, M., Joe, M., Dijkhuizen, R. M. & van der Toorn, A. Early life stress-induced alterations in rat brain structures measured with high resolution MRI. *PLoS One* **12**, 1–14 (2017).
33. Jenkinson, M., Bannister, P., Brady, M. & Smith, S. Improved optimization for the robust and accurate linear registration and motion correction of brain images. *Neuroimage* **17**, 825–841 (2002).
34. Smith, S. M. Fast robust automated brain extraction. *Hum. Brain Mapp.* **17**, 143–155 (2002).
35. Cox, R. W. AFNI: Software for Analysis and Visualization of Functional Magnetic Resonance Neuroimages. *Comput. Biomed Res.* **29**, 162–173 (1996).

36. Tournier, J. D., Calamante, F. & Connelly, A. MRtrix: Diffusion tractography in crossing fiber regions. *Int. J. Imaging Syst. Technol.* **22**, 53–66 (2012).
37. Tournier, J. D., Calamante, F. & Connelly, A. Improved probabilistic streamlines tractography by 2nd order integration over fibre orientation distributions. *Proc. Int. Soc. Magn. Reson. Med.* 1670 (2010).
38. Smith, R. E., Tournier, J. D., Calamante, F. & Connelly, A. SIFT: Spherical-deconvolution informed filtering of tractograms. *Neuroimage* **67**, 298–312 (2013).
39. Smith, R. E., Tournier, J. D., Calamante, F. & Connelly, A. The effects of SIFT on the reproducibility and biological accuracy of the structural connectome. *Neuroimage* **104**, 253–265 (2015).
40. Paxinos, G. & Watson, W. *The rat brain in stereotaxic coordinates 5th edition*. (Elsevier Academic Press, Amsterdam, 2005).
41. Majka, P., Kublik, E., Furga, G. & Wójcik, D. K. Common atlas format and 3D brain atlas reconstructor: Infrastructure for Constructing 3D brain atlases. *Neuroinformatics* **10**, 181–197 (2012).
42. Jenkinson, M. & Smith, S. A global optimisation method for robust affine registration of brain images. *Med. Image Anal.* **5**, 143–156 (2001).
43. Andersson, J. L. R., Jenkinson, M. & Smith, S. Non-linear registration aka Spatial normalisation. *FMRIB Tech. Rep. TR07JA2* (2007).
44. Sierakowiak, A. *et al.* Default mode network, motor network, dorsal and ventral basal ganglia networks in the rat brain: Comparison to human networks using resting state-fMRI. *PLoS One* **10**, 1–20 (2015).
45. Lu, H. *et al.* Rat brains also have a default mode network. *Proc Natl Acad Sci U S A* **109**, 3979–3984 (2012).
46. R Core Team. R: A language and environment for statistical computing. (2014).
47. Díaz-Parra, A., Osborn, Z., Canals, S., Moratal, D. & Sporns, O. Structural and functional, empirical and modeled connectivity in the cerebral cortex of the rat. *Neuroimage* **159**, 170–184 (2017).

48. Shen, K. *et al.* Information Processing Architecture of Functionally Defined Clusters in the Macaque Cortex. *J. Neurosci.* **32**, 17465–17476 (2012).
49. O'Reilly, J. X. *et al.* Causal effect of disconnection lesions on interhemispheric functional connectivity in rhesus monkeys. *Proc. Natl. Acad. Sci. U. S. A.* **110**, 13982–13987 (2013).
50. Pawela, C. P. *et al.* Resting-state functional connectivity of the rat brain. *Magn. Reson. Med.* **59**, 1021–1029 (2008).
51. Rocco-Donovan, M., Ramos, R. L., Giraldo, S. & Brumberg, J. C. Characteristics of synaptic connections between rodent primary somatosensory and motor cortices. *Somatosens. Mot. Res.* **28**, 63–72 (2011).
52. Miyashita, E., Keller, A. & Asanuma, H. Input-output organization of the rat vibrissal motor cortex. *Exp. Brain Res.* **99**, 223–232 (1994).
53. Hoffer, Z. S., Hoover, J. E. & Alloway, K. D. Sensorimotor Corticocortical Projections from Rat Barrel Cortex Have an Anisotropic Organization That Facilitates Integration of Inputs from Whiskers in the Same Row. *J. Comp. Neurol.* **466**, 525–544 (2003).
54. Horn, A., Ostwald, D., Reisert, M. & Blankenburg, F. The structural-functional connectome and the default mode network of the human brain. *Neuroimage* **102**, 142–151 (2014).
55. Greicius, M. D., Supekar, K., Menon, V. & Dougherty, R. F. Resting-state Functional Connectivity Reflects Structural Connectivity in the Default Mode Network. *Cereb. Cortex* **19**, 72–78 (2009).
56. Reveley, C. *et al.* Superficial white matter fiber systems impede detection of long-range cortical connections in diffusion MR tractography. *Proc. Natl. Acad. Sci.* **112**, E2820–E2828 (2015).
57. Ercsey-Ravasz, M. *et al.* A predictive network model of cerebral cortical connectivity based on a distance rule. *Neuron* **80**, 184–97 (2013).
58. Deco, G. *et al.* Identification of Optimal Structural Connectivity Using Functional Connectivity and Neural Modeling. *J. Neurosci.* **34**, 7910–7916 (2014).
59. Messé, A., Rudrauf, D., Benali, H. & Marrelec, G. Relating Structure and Function in the Human Brain: Relative Contributions of Anatomy , Stationary Dynamics , and Non-



- stationarities. *PLoS Comput. Biol.* **10**, e1003530 (2014).
60. Lee, T. & Xue, S. Revisiting the Functional and Structural Connectivity of Large-Scale Cortical Networks. *Brain Connect.* **8**, 129–138 (2018).
61. Tononi, G., Sporns, O. & Edelman, G. M. A measure for brain complexity: Relating functional segregation and integration in the nervous system. *Proc. Natl. Acad. Sci. U. S. A.* **91**, 5033–5037 (1994).
62. Fox, P. T. & Friston, K. J. Distributed processing; distributed functions? *Neuroimage* **61**, 407–426 (2012).
63. Fukushima, M. *et al.* Structure – function relationships during segregated and integrated network states of human brain functional connectivity. *Brain Struct. Funct.* **223**, 1091–1106 (2018).
64. Mcdonough, I. M. & Siegel, J. T. The Relation Between White Matter Microstructure and Network Complexity: Implications for Processing Efficiency. *Front. Integr. Neurosci.* **12**, 43 (2018).
65. Meier, J. *et al.* A Mapping Between Structural and Functional Brain Networks. *Brain Connect.* **6**, 298–311 (2016).
66. van Meer, M. P. A. *et al.* Correspondence between altered functional and structural connectivity in the contralesional sensorimotor cortex after unilateral stroke in rats: a combined resting-state functional MRI and manganese-enhanced MRI study. *J. Cereb. Blood Flow Metab.* **30**, 1707–11 (2010).
67. van Meer, M. P. A. *et al.* Extent of bilateral neuronal network reorganization and functional recovery in relation to stroke severity. *J. Neurosci.* **32**, 4495–4507 (2012).
68. Schmitt, O. *et al.* Prediction of regional functional impairment following experimental stroke via connectome analysis. *Sci. Rep.* **7**, 46316 (2017).
69. Carter, A. R. *et al.* Resting Inter-hemispheric fMRI Connectivity Predicts Performance after Stroke. *Ann. Neurol.* **67**, 365–375 (2010).
70. Grefkes, C. & Fink, G. R. Connectivity-based approaches in stroke and recovery of function. *Lancet Neurol.* **13**, 206–216 (2014).

71. Radlinska, B. A. *et al.* Changes in callosal motor fiber integrity after subcortical stroke of the pyramidal tract. *J. Cereb. Blood Flow Metab.* **32**, 1515–1524 (2012).
72. Calabrese, E., Badea, A., Cofer, G., Qi, Y. & Allan Johnson, G. A Diffusion MRI Tractography Connectome of the Mouse Brain and Comparison with Neuronal Tracer Data. *Cereb. Cortex* **25**, 4628–4637 (2015).
73. Chen, H. *et al.* Optimization of large-scale mouse brain connectome via joint evaluation of DTI and neuron tracing data. *Neuroimage* **115**, 202–213 (2015).
74. Paasonen, J., Stenroos, P., Salo, R. A., Kiviniemi, V. & Gröhn, O. Functional connectivity under six anesthesia protocols and the awake condition in rat brain. *Neuroimage* **172**, 9–20 (2018).

## Figures

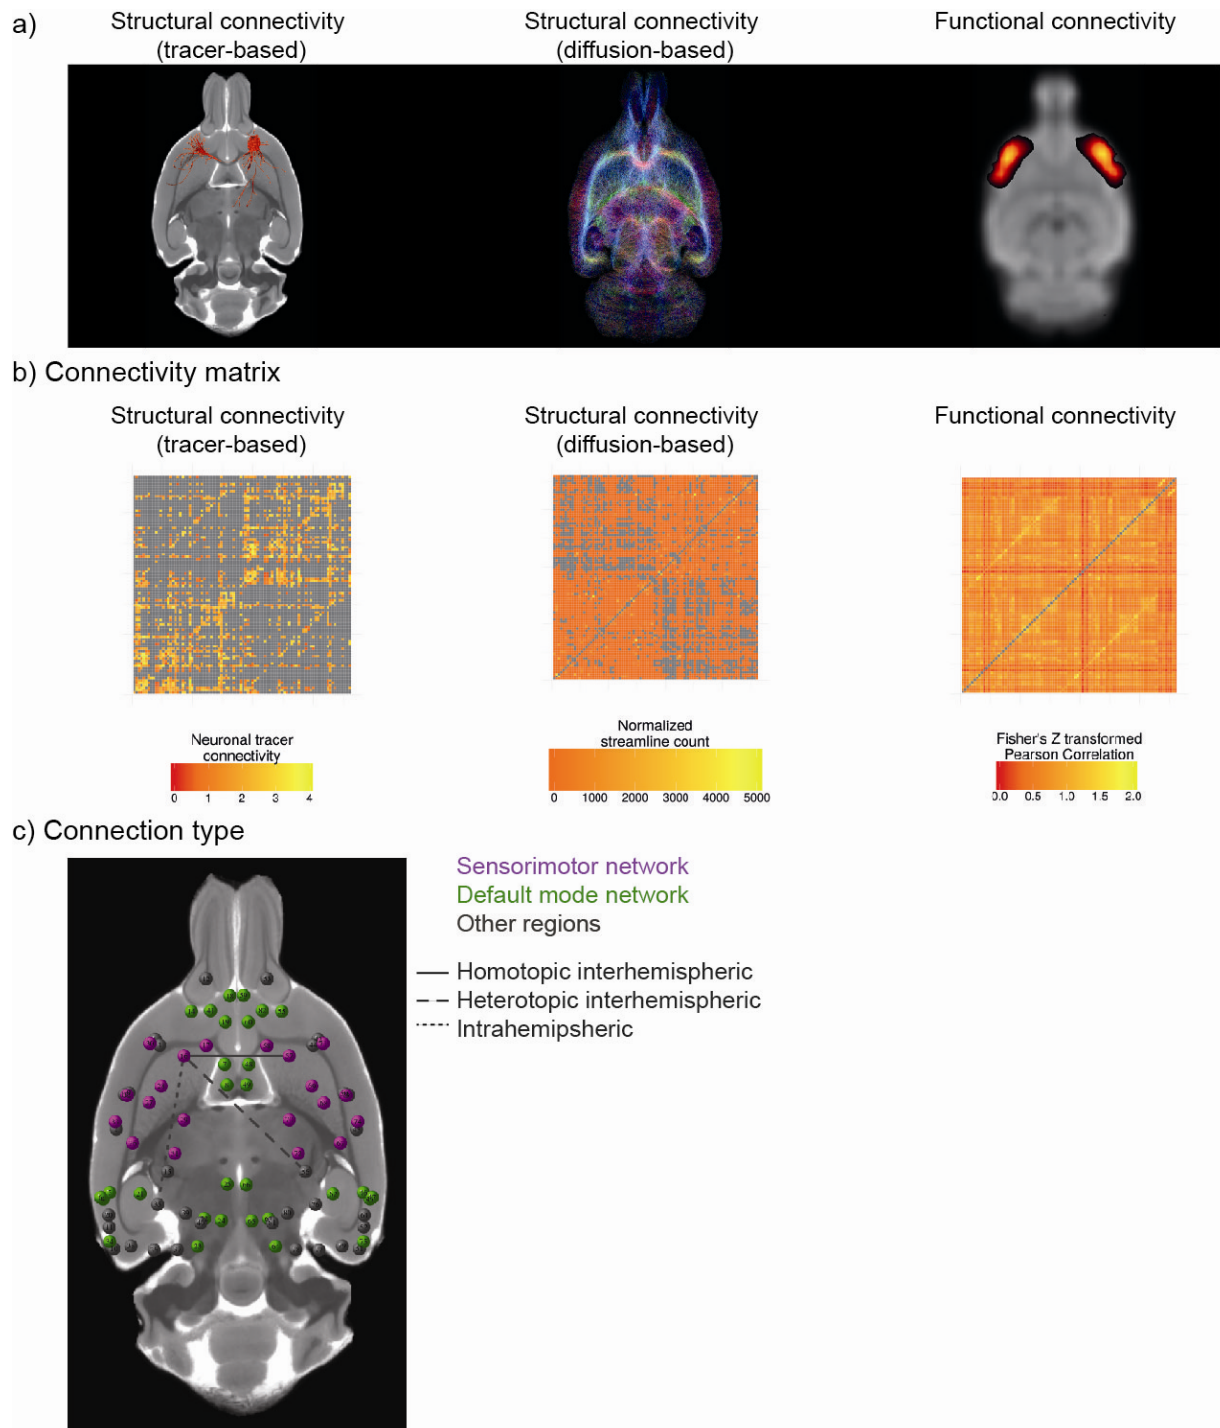

**Figure 1: Overview of the analysis pipeline.** Rat brain images are shown as axial views. Different measures of connectivity in the rat brain were assessed (a): meso-scale neuronal tracer-based structural connectivity (left), macro-scale diffusion-based structural connectivity (middle) and macro-scale resting-state functional connectivity (right). For each measure, we determined the connectivity

matrix between 82 cortical regions of interest, with exclusion of the self-connections (central diagonal line) (b). We combined all connectivity matrices to determine the structure-function connectome of the rat brain (c) (circles representing nodes). The connectomes are visualized in 3D. The colors in (c) represent two well-described functional resting-state networks in the rat brain: the sensorimotor network (purple) and the default mode network (green). Regions not belonging to these networks are shown in gray. The lines represent different regional types of connections: homotopic interhemispheric connection (solid line), heterotopic interhemispheric connection (dashed line) or intrahemispheric connection (dotted line).

a) Strong structural network  
Strong functional connectivity

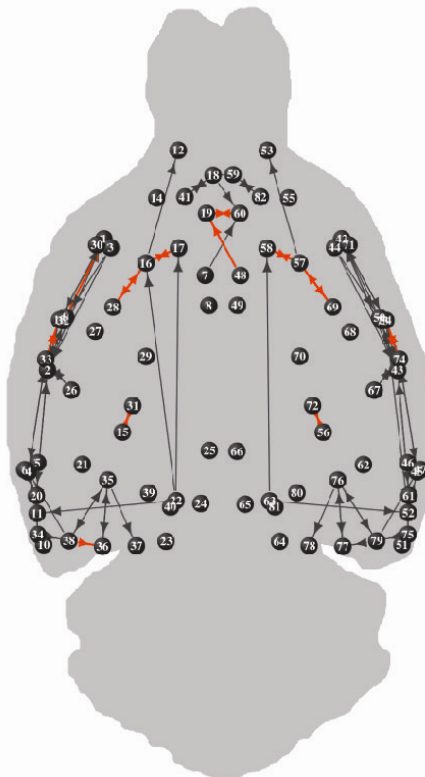

Weak functional connectivity

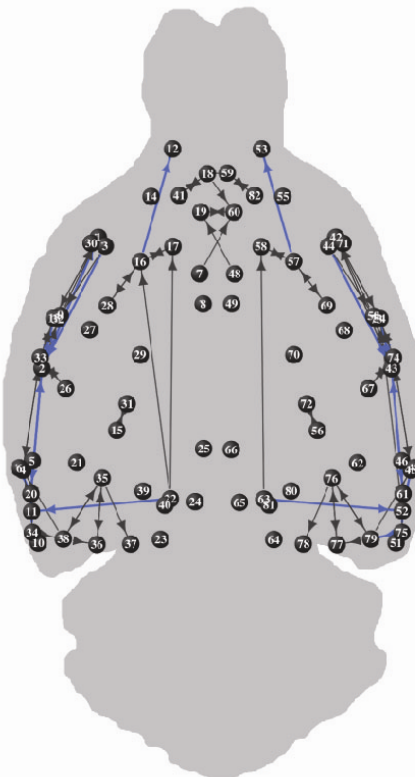

b) Weak structural network  
Strong functional connectivity

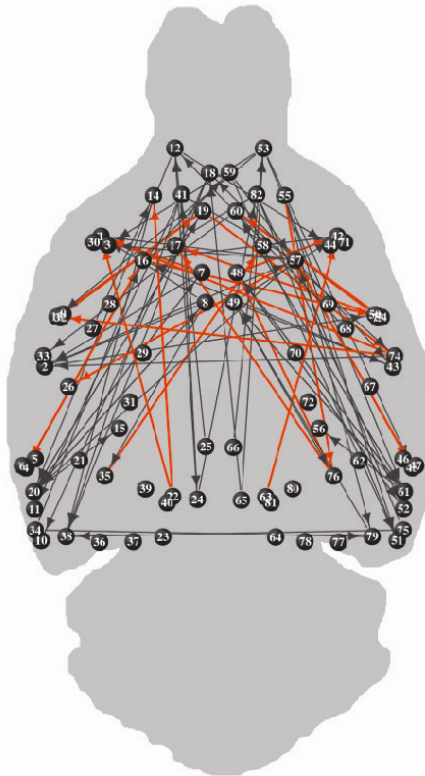

Weak functional connectivity

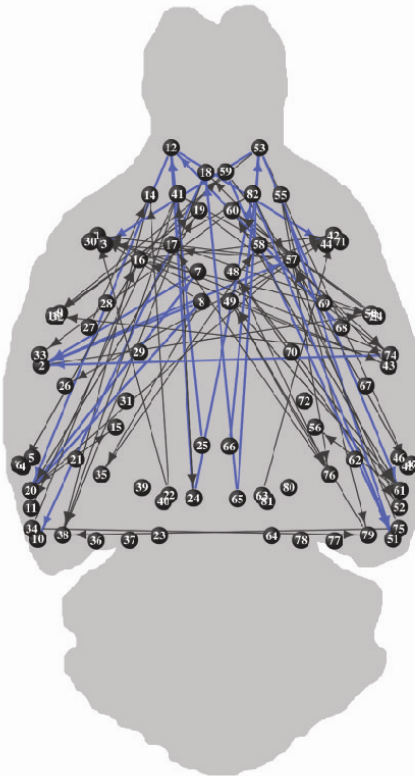

**Figure 2: Strongest and weakest functional connections within the strongest and weakest structural networks.** The strongest structural network consists of the 25% strongest structural connections at the macro-scale and meso-scale (a), and the weakest structural network consists of the 25% weakest (b). Functional connectivity is colored for the 25% strongest (red) and 25% weakest functional connections (blue). Circles represent the nodes (regions of interest), with numbers representing the regions listed in Table 1, and lines represent the edges (connections). The connectomes are visualized in 3D. The arrowheads reflect directionality information determined from the neuronal tracer-based structural connectivity dataset.

| 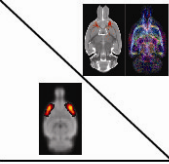 | Strong structural connectivity<br>(macro- and meso-scale)                                                                                                                                                                    | Weak structural connectivity<br>(macro- and meso-scale)                                                                                                                                                                                                           |                                                                                                                                        |
|-----------------------------------------------------------------------------------|------------------------------------------------------------------------------------------------------------------------------------------------------------------------------------------------------------------------------|-------------------------------------------------------------------------------------------------------------------------------------------------------------------------------------------------------------------------------------------------------------------|----------------------------------------------------------------------------------------------------------------------------------------|
|                                                                                   | Strong functional connectivity                                                                                                                                                                                               | Weak functional connectivity                                                                                                                                                                                                                                      |                                                                                                                                        |
|                                                                                   | <ul style="list-style-type: none"> <li>* Intrahemispheric connections</li> <li>* Sensorimotor network / within default mode network</li> <li>* Short distance</li> </ul>                                                     | <ul style="list-style-type: none"> <li>* Heterotopic interhemispheric/ intrahemispheric connections</li> <li>* Sensorimotor network / Default mode network</li> <li>* Long distance</li> </ul>                                                                    | <i>Cortical connections within or between the sensorimotor network and default mode network</i>                                        |
|                                                                                   | <ul style="list-style-type: none"> <li>* Intrahemispheric connections</li> <li>* Parahippocampal areas, insular, auditory cortex</li> <li>* Outside of functional networks</li> <li>* Short/Intermediate distance</li> </ul> | <ul style="list-style-type: none"> <li>* Heterotopic interhemispheric/ intrahemispheric connections</li> <li>* Frontal cortices, parahippocampal areas, retrosplenial cortex</li> <li>* Default mode network to other network</li> <li>* Long distance</li> </ul> | <i>Cortical connections outside of included functional networks or between the default mode network and another functional network</i> |
|                                                                                   | <i>Short distance intrahemispheric cortical connections</i>                                                                                                                                                                  | <i>Long distance interhemispheric or intrahemispheric cortical connections</i>                                                                                                                                                                                    |                                                                                                                                        |

**Figure 3: Characteristics of connections per subcategory of structural and functional connectivity.** Structural connectivity is depicted in columns, whereas functional connectivity is depicted in rows. Strong connections belong to the 25% strongest connections; structurally based on diffusion MRI and neuronal tracing (i.e. at both the macro- and meso-scale) and functionally based on resting-state fMRI. Similarly, weak structural connections belong to the 25% weakest connections.

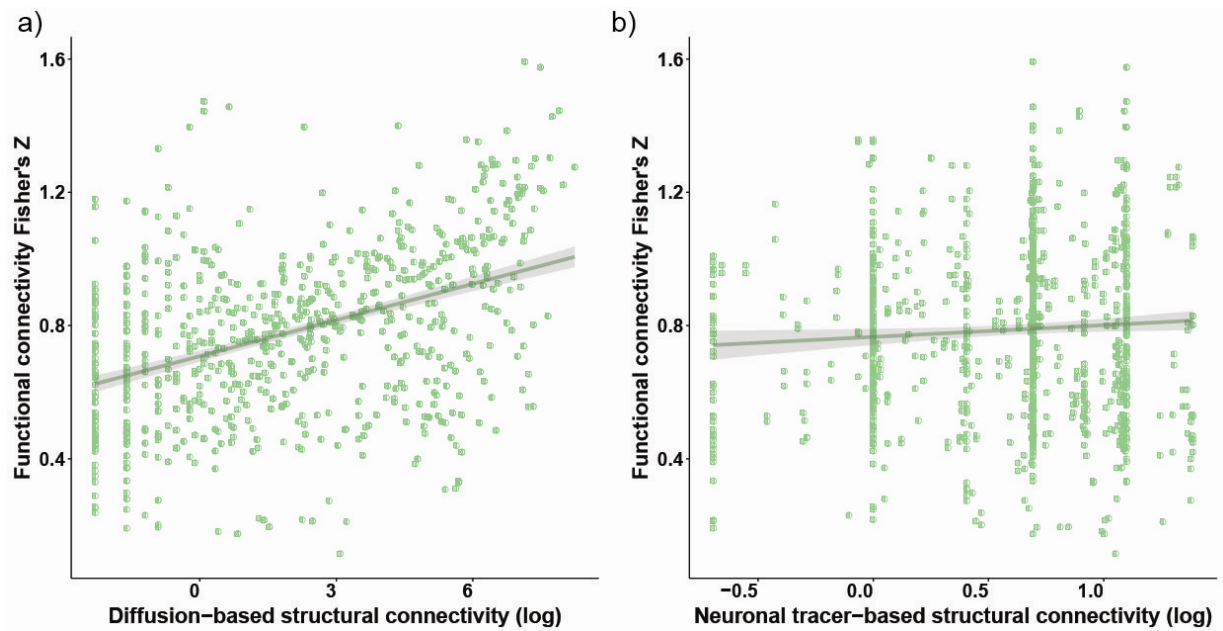

**Figure 4: Whole-brain structure-function relationships at the structural macro-scale (diffusion-based structural connectivity) and meso-scale (neuronal tracer-based structural connectivity).** Functional connectivity strength is plotted as the Fisher's Z-transformed correlation coefficient versus the log-transformed diffusion-based (a) or neuronal tracer-based structural connectivity strength (b). Individual connections are plotted as green dots. The structure-function relationship is shown as a linear fit, with shading representing the 95% confidence intervals of the fit.



## Tables

**Table 1: Included regions of interest for resting-state fMRI, diffusion MRI and neuronal tracer analyses.**

| <i>Names (Abbreviations) of Paxinos &amp; Watson atlas regions</i> | <i>Left</i> | <i>Right</i> |
|--------------------------------------------------------------------|-------------|--------------|
| <i>Agranular insular cortex dorsal part (AID)</i>                  | 1           | 42           |
| <i>Agranular insular cortex posterior part (AIP)</i>               | 2           | 43           |
| <i>Agranular insular cortex ventral part (AIV)</i>                 | 3           | 44           |
| <i>Primary auditory cortex (AuI)</i>                               | 4           | 45           |
| <i>Secondary auditory cortex dorsal area (AuD)</i>                 | 5           | 46           |
| <i>Secondary auditory cortex ventral area (AuV)</i>                | 6           | 47           |
| <i>Cingulate cortex area 1 (Cg1)</i>                               | 7           | 48           |
| <i>Cingulate cortex area 2 (Cg2)</i>                               | 8           | 49           |
| <i>Dysgranular insular cortex (DI)</i>                             | 9           | 50           |
| <i>Dorsolateral entorhinal cortex (DLEnt)</i>                      | 10          | 51           |
| <i>Ectorhinal cortex (Ect)</i>                                     | 11          | 52           |
| <i>Frontal association cortex (FrA)</i>                            | 12          | 53           |
| <i>Granular insular cortex (GI)</i>                                | 13          | 54           |
| <i>Lateral orbital cortex (LO)</i>                                 | 14          | 55           |
| <i>Lateral parietal association cortex (LptA)</i>                  | 15          | 56           |
| <i>Primary motor cortex (M1)</i>                                   | 16          | 57           |
| <i>Secondary motor cortex (M2)</i>                                 | 17          | 58           |
| <i>Medial orbital cortex (MO)</i>                                  | 18          | 59           |
| <i>Medial prefrontal cortex (mPFC)</i>                             | 19          | 60           |
| <i>Perirhinal cortex (Prh)</i>                                     | 20          | 61           |
| <i>Parietal cortex posterior area dorsal part (ParPD)</i>          | 21          | 62           |
| <i>Retrosplenial dorsal (RSd)</i>                                  | 22          | 63           |
| <i>Retrosplenial granular cortex a region (RSGa)</i>               | 23          | 64           |
| <i>Retrosplenial granular cortex b region (RSGb)</i>               | 24          | 65           |
| <i>Retrosplenial granular cortex c region (RSGc)</i>               | 25          | 66           |
| <i>Primary somatosensory cortex barrel field (S1BF)</i>            | 26          | 67           |
| <i>Primary somatosensory cortex dysgranular region (SIDZ)</i>      | 27          | 68           |
| <i>Primary somatosensory cortex forelimb region (S1FL)</i>         | 28          | 69           |
| <i>Primary somatosensory cortex hindlimb region (S1HL)</i>         | 29          | 70           |
| <i>Primary somatosensory cortex jaw region (SIJ)</i>               | 30          | 71           |
| <i>Primary somatosensory cortex trunk region (S1Tr)</i>            | 31          | 72           |
| <i>Primary somatosensory cortex upper lib region (S1ULp)</i>       | 32          | 73           |
| <i>Secondary somatosensory cortex (S2)</i>                         | 33          | 74           |
| <i>Temporal association cortex 1 (TeA)</i>                         | 34          | 75           |
| <i>Primary visual cortex (VI)</i>                                  | 35          | 76           |
| <i>Primary visual cortex binocular area (VIB)</i>                  | 36          | 77           |
| <i>Primary visual cortex monocular area (VIM)</i>                  | 37          | 78           |
| <i>Secondary visual cortex lateral area (V2L)</i>                  | 38          | 79           |
| <i>Secondary visual cortex mediolateral area (V2ML)</i>            | 39          | 80           |
| <i>Secondary visual cortex mediodorsal area (V2MM)</i>             | 40          | 81           |
| <i>Ventral orbital cortex (VO)</i>                                 | 41          | 82           |

The numbers for the left and right regions of interest are corresponding to the numbers of the nodes in Figure 2.



**Table 2: Characteristics of cortical connections in the rat brain with strong meso- and macro-scale structural connectivity and strong functional connectivity.**

| Seed          | Target        | Neuronal<br>tracer-based<br>structural<br>connectivity<br>strength | Diffusion-<br>based<br>structural<br>connectivity<br>strength | Functional<br>connectivity<br>strength (Z') | Euclidean<br>distance (mm) | Connection type<br>(network)               | Connection type (regional) |
|---------------|---------------|--------------------------------------------------------------------|---------------------------------------------------------------|---------------------------------------------|----------------------------|--------------------------------------------|----------------------------|
| Left<br>mPFC  | Right<br>mPFC | 3.00                                                               | 1790.10                                                       | 1.58                                        | 1.18                       | Within DMN                                 | Homotopic interhemispheric |
| Right<br>mPFC | Left<br>mPFC  | 3.00                                                               | 1790.10                                                       | 1.58                                        | 1.18                       | Within DMN                                 | Homotopic interhemispheric |
| Left<br>DI    | Left<br>GI    | 2.96                                                               | 1046.70                                                       | 1.30                                        | 0.31                       | No                                         | Intrahemispheric left      |
| Left<br>GI    | Left<br>DI    | 2.89                                                               | 1046.70                                                       | 1.30                                        | 0.31                       | No                                         | Intrahemispheric left      |
| Left<br>LPtA  | Left<br>S1Tr  | 3.00                                                               | 629.20                                                        | 1.28                                        | 0.97                       | Sensorimotor network to<br>another network | Intrahemispheric left      |
| Left<br>S1Tr  | Left<br>LPtA  | 3.00                                                               | 629.20                                                        | 1.28                                        | 0.97                       | Sensorimotor network to<br>another network | Intrahemispheric left      |
| Left<br>V2L   | Left<br>V1B   | 3.00                                                               | 1474.60                                                       | 1.28                                        | 1.43                       | No                                         | Intrahemispheric left      |
| Left<br>M1    | Left<br>M2    | 2.96                                                               | 3787.60                                                       | 1.28                                        | 1.27                       | Within sensorimotor<br>network             | Intrahemispheric left      |
| Left<br>M2    | Left<br>M1    | 3.76                                                               | 3787.60                                                       | 1.28                                        | 1.27                       | Within sensorimotor<br>network             | Intrahemispheric left      |
| Right<br>LPtA | Right<br>S1Tr | 3.00                                                               | 533.70                                                        | 1.27                                        | 0.98                       | Sensorimotor network to<br>another network | Intrahemispheric right     |
| Right<br>S1Tr | Right<br>LPtA | 3.00                                                               | 533.70                                                        | 1.27                                        | 0.98                       | Sensorimotor network to<br>another network | Intrahemispheric right     |
| Left<br>GI    | Left<br>S2    | 3.72                                                               | 1075.40                                                       | 1.25                                        | 1.64                       | Sensorimotor network to<br>another network | Intrahemispheric left      |
| Left<br>S2    | Left<br>GI    | 3.62                                                               | 1075.40                                                       | 1.25                                        | 1.64                       | Sensorimotor network to<br>another network | Intrahemispheric left      |
| Right<br>M1   | Right<br>M2   | 2.96                                                               | 2958.90                                                       | 1.22                                        | 1.27                       | Within sensorimotor<br>network             | Intrahemispheric right     |
| Right<br>M2   | Right<br>M1   | 3.76                                                               | 2958.90                                                       | 1.22                                        | 1.27                       | Within sensorimotor<br>network             | Intrahemispheric right     |
| Right<br>GI   | Right S2      | 3.72                                                               | 1261.10                                                       | 1.22                                        | 1.63                       | Sensorimotor network to<br>another network | Intrahemispheric right     |
| Right<br>S2   | Right GI      | 3.62                                                               | 1261.10                                                       | 1.22                                        | 1.63                       | Sensorimotor network to<br>another network | Intrahemispheric right     |

|               |               |      |         |      |      |                                |                                 |
|---------------|---------------|------|---------|------|------|--------------------------------|---------------------------------|
| Right<br>DI   | Right GI      | 2.96 | 1200.00 | 1.21 | 0.31 | No                             | Intrahemispheric right          |
| Right<br>GI   | Right DI      | 2.89 | 1200.00 | 1.21 | 0.31 | No                             | Intrahemispheric right          |
| Left<br>M1    | Left<br>S1FL  | 2.88 | 1189.60 | 1.20 | 1.90 | Within sensorimotor<br>network | Intrahemispheric left           |
| Left<br>S1FL  | Left<br>M1    | 2.86 | 1189.60 | 1.20 | 1.90 | Within sensorimotor<br>network | Intrahemispheric left           |
| Right<br>M1   | Right<br>S1FL | 2.88 | 1077.70 | 1.20 | 1.91 | Within sensorimotor<br>network | Intrahemispheric right          |
| Right<br>S1FL | Right<br>M1   | 2.86 | 1077.70 | 1.20 | 1.91 | Within sensorimotor<br>network | Intrahemispheric right          |
| Left<br>AuD   | Left AuI      | 3.00 | 1098.90 | 1.18 | 0.78 | Within DMN                     | Intrahemispheric left           |
| Right<br>CgI  | Left<br>mPFC  | 3.00 | 260.00  | 1.18 | 2.87 | Within DMN                     | Heterotopic<br>interhemispheric |
| Left<br>DI    | Left AID      | 3.00 | 851.00  | 1.16 | 3.05 | No                             | Intrahemispheric left           |

Seed and target regions were determined from the NeuroVIISAS tracer database. DMN: Default mode network; AID: agranular insular cortex dorsal part; AuI: primary auditory cortex; AuD: secondary auditory cortex dorsal area; CgI: cingulate cortex area 1; DI: dysgranular insular cortex; GI: granular insular cortex; LPtA: lateral parietal association cortex; M1: primary motor cortex; M2: secondary motor cortex; mPFC: medial prefrontal cortex; S1FL: primary somatosensory cortex forelimb region; S1Tr: primary somatosensory cortex trunk region; S2: secondary somatosensory cortex; V1B: primary visual cortex binocular area; V2L: secondary visual cortex lateral area.

**Table 3: Characteristics of cortical connections in the rat brain with weak meso- and macro-scale structural connectivity and weak functional connectivity.**

| Seed        | Target         | Neuronal<br>tracer-based<br>structural<br>connectivity<br>strength | Diffusion-<br>based<br>structural<br>connectivity<br>strength | Functional<br>connectivity<br>strength (Z') | Euclidean<br>distance (mm) | Connection type<br>(network) | Connection type (regional) |
|-------------|----------------|--------------------------------------------------------------------|---------------------------------------------------------------|---------------------------------------------|----------------------------|------------------------------|----------------------------|
| Right<br>LO | Right<br>DLEnt | 0.50                                                               | 0.20                                                          | 0.19                                        | 12.49                      | DMN to another network       | Intrahemispheric right     |
| Right<br>VO | Right<br>DLEnt | 0.90                                                               | 0.30                                                          | 0.23                                        | 12.85                      | DMN to another network       | Intrahemispheric right     |
| Left        | Left           | 1.00                                                               | 0.20                                                          | 0.25                                        | 13.99                      | DMN to another network       | Intrahemispheric left      |

|       |       |      |      |      |       |                                            |                                 |
|-------|-------|------|------|------|-------|--------------------------------------------|---------------------------------|
| MO    | DLEnt |      |      |      |       |                                            |                                 |
| Right | Right | 1.00 | 0.10 | 0.26 | 14.00 | DMN to another network                     | Intrahemispheric right          |
| MO    | DLEnt |      |      |      |       |                                            |                                 |
| Left  | Left  | 1.05 | 0.20 | 0.28 | 13.11 | No                                         | Intrahemispheric left           |
| FrA   | PRh   |      |      |      |       |                                            |                                 |
| Right | Right | 0.50 | 0.20 | 0.33 | 11.97 | DMN to another network                     | Intrahemispheric right          |
| RSGb  | FrA   |      |      |      |       |                                            |                                 |
| Right | Right | 1.05 | 0.20 | 0.37 | 13.10 | No                                         | Intrahemispheric right          |
| FrA   | PRh   |      |      |      |       |                                            |                                 |
| Left  | Left  | 0.50 | 0.50 | 0.39 | 11.95 | DMN to another network                     | Intrahemispheric left           |
| RSGb  | FrA   |      |      |      |       |                                            |                                 |
| Right | Right | 0.50 | 0.40 | 0.40 | 10.26 | DMN to another network                     | Intrahemispheric right          |
| RSGc  | FrA   |      |      |      |       |                                            |                                 |
| Left  | Left  | 0.50 | 0.30 | 0.41 | 7.61  | DMN to another network                     | Intrahemispheric left           |
| Cg2   | AIP   |      |      |      |       |                                            |                                 |
| Left  | Left  | 0.50 | 0.10 | 0.43 | 8.50  | DMN to another network                     | Intrahemispheric left           |
| Cg1   | AIP   |      |      |      |       |                                            |                                 |
| Left  | Left  | 1.00 | 0.20 | 0.44 | 9.54  | DMN to another network                     | Intrahemispheric left           |
| Cg2   | PRh   |      |      |      |       |                                            |                                 |
| Left  | Left  | 1.00 | 0.20 | 0.44 | 9.54  | DMN to another network                     | Intrahemispheric left           |
| PRh   | Cg2   |      |      |      |       |                                            |                                 |
| Right | Left  | 1.00 | 0.10 | 0.45 | 8.66  | Sensorimotor network to<br>another network | Heterotopic<br>interhemispheric |
| S1DZ  | FrA   |      |      |      |       |                                            |                                 |
| Right | Left  | 1.13 | 0.30 | 0.45 | 7.12  | No                                         | Heterotopic<br>interhemispheric |
| FrA   | AIV   |      |      |      |       |                                            |                                 |
| Left  | Right | 0.74 | 0.20 | 0.45 | 11.15 | Sensorimotor network to<br>another network | Heterotopic<br>interhemispheric |
| AIP   | M1    |      |      |      |       |                                            |                                 |
| Left  | Left  | 0.50 | 0.40 | 0.46 | 10.24 | DMN to another network                     | Intrahemispheric left           |
| RSGc  | FrA   |      |      |      |       |                                            |                                 |
| Left  | Right | 1.13 | 0.10 | 0.46 | 7.11  | No                                         | Heterotopic<br>interhemispheric |
| FrA   | AIV   |      |      |      |       |                                            |                                 |
| Left  | Left  | 1.00 | 0.20 | 0.46 | 10.58 | DMN to another network                     | Intrahemispheric left           |
| Cg1   | PRh   |      |      |      |       |                                            |                                 |
| Left  | Left  | 0.75 | 0.20 | 0.46 | 10.58 | DMN to another network                     | Intrahemispheric left           |
| PRh   | Cg1   |      |      |      |       |                                            |                                 |
| Right | Left  | 0.75 | 0.10 | 0.47 | 12.64 | Sensorimotor network to<br>another network | Heterotopic<br>interhemispheric |
| S2    | AIP   |      |      |      |       |                                            |                                 |
| Right | Left  | 0.50 | 0.10 | 0.47 | 11.36 | Within DMN                                 | Heterotopic<br>interhemispheric |
| RSGb  | MO    |      |      |      |       |                                            |                                 |
| Left  | Right | 0.50 | 0.10 | 0.47 | 10.90 | Within DMN                                 | Heterotopic<br>interhemispheric |
| RSGb  | VO    |      |      |      |       |                                            |                                 |

Seed and target regions were determined from the NeuroVIISAS tracer database. DMN: Default mode network; AIP: agranular insular cortex posterior part; AIV: agranular insular cortex ventral part; Cg1: cingulate cortex area 1; Cg2: cingulate cortex area 2; DLEnt: dorsolateral entorhinal cortex; FrA: frontal association cortex; LO: lateral orbital cortex; M1: Primary motor cortex; MO: medial orbital cortex; Prh: perirhinal cortex; RSGb: retrosplenial granular cortex b region; RSGc: retrosplenial granular cortex c region; S1DZ: primary somatosensory cortex dysgranular region; S2: Secondary somatosensory cortex; VO: ventral orbital cortex.

**Table 4: Characteristics of cortical connections in the rat brain with strong meso- and macro-scale structural connectivity and weak functional connectivity.**

| Seed         | Target       | Neuronal<br>tracer-based<br>structural<br>connectivity<br>strength | Diffusion-<br>based<br>structural<br>connectivity<br>strength | Functional<br>connectivity<br>strength (Z') | Euclidean<br>distance (mm) | Connection type<br>(network)               | Connection type (regional) |
|--------------|--------------|--------------------------------------------------------------------|---------------------------------------------------------------|---------------------------------------------|----------------------------|--------------------------------------------|----------------------------|
| Left<br>AIP  | Left<br>PRh  | 3.66                                                               | 317.50                                                        | 0.42                                        | 4.37                       | No                                         | Intrahemispheric left      |
| Left<br>PRh  | Left<br>AIP  | 4.00                                                               | 317.50                                                        | 0.42                                        | 4.37                       | No                                         | Intrahemispheric left      |
| Right<br>TeA | Right<br>PRh | 2.94                                                               | 250.70                                                        | 0.46                                        | 2.38                       | DMN to another network                     | Intrahemispheric right     |
| Left<br>AuV  | Left<br>PRh  | 2.75                                                               | 141.30                                                        | 0.48                                        | 1.49                       | DMN to another network                     | Intrahemispheric left      |
| Left<br>TeA  | Left<br>PRh  | 2.94                                                               | 466.60                                                        | 0.51                                        | 2.38                       | DMN to another network                     | Intrahemispheric left      |
| Right<br>M1  | Right<br>FrA | 2.93                                                               | 154.80                                                        | 0.52                                        | 4.17                       | Sensorimotor network to<br>another network | Intrahemispheric right     |
| Right<br>AIP | Right<br>PRh | 3.66                                                               | 316.30                                                        | 0.53                                        | 4.35                       | No                                         | Intrahemispheric right     |
| Right<br>PRh | Right<br>AIP | 4.00                                                               | 316.30                                                        | 0.53                                        | 4.35                       | No                                         | Intrahemispheric right     |
| Left<br>Ect  | Left<br>PRh  | 3.90                                                               | 1523.80                                                       | 0.56                                        | 1.14                       | No                                         | Intrahemispheric left      |
| Left<br>PRh  | Left<br>Ect  | 3.83                                                               | 1523.80                                                       | 0.56                                        | 1.14                       | No                                         | Intrahemispheric left      |
| Right<br>S2  | Right<br>AIP | 3.00                                                               | 125.00                                                        | 0.56                                        | 2.22                       | Sensorimotor network to<br>another network | Intrahemispheric right     |
| Left         | Left         | 3.00                                                               | 301.10                                                        | 0.59                                        | 4.86                       | No                                         | Intrahemispheric left      |

| AIV   | AIP   |      |         |      |      |                                         |                        |
|-------|-------|------|---------|------|------|-----------------------------------------|------------------------|
| Left  | Left  | 2.93 | 181.70  | 0.59 | 4.18 | Sensorimotor network to another network | Intrahemispheric left  |
| M1    | FrA   |      |         |      |      |                                         |                        |
| Right | Right | 3.90 | 1215.60 | 0.61 | 1.12 | No                                      | Intrahemispheric right |
| Ect   | PRh   |      |         |      |      |                                         |                        |
| Right | Right | 3.83 | 1215.60 | 0.61 | 1.12 | No                                      | Intrahemispheric right |
| PRh   | Ect   |      |         |      |      |                                         |                        |
| Right | Right | 3.00 | 226.80  | 0.62 | 6.12 | DMN to another network                  | Intrahemispheric right |
| RSd   | Ect   |      |         |      |      |                                         |                        |
| Left  | Left  | 3.00 | 145.90  | 0.63 | 5.20 | No                                      | Intrahemispheric left  |
| AID   | AIP   |      |         |      |      |                                         |                        |
| Left  | Left  | 2.90 | 145.90  | 0.63 | 5.20 | No                                      | Intrahemispheric left  |
| AIP   | AID   |      |         |      |      |                                         |                        |
| Right | Right | 3.00 | 277.30  | 0.66 | 4.88 | No                                      | Intrahemispheric right |
| AIV   | AIP   |      |         |      |      |                                         |                        |
| Right | Right | 3.00 | 217.30  | 0.67 | 1.81 | DMN to another network                  | Intrahemispheric right |
| Ect   | Au1   |      |         |      |      |                                         |                        |
| Left  | Left  | 3.69 | 249.30  | 0.68 | 2.21 | No                                      | Intrahemispheric left  |
| AIP   | GI    |      |         |      |      |                                         |                        |
| Left  | Left  | 2.91 | 249.30  | 0.68 | 2.21 | No                                      | Intrahemispheric left  |
| GI    | AIP   |      |         |      |      |                                         |                        |
| Left  | Left  | 3.00 | 152.40  | 0.71 | 6.12 | DMN to another network                  | Intrahemispheric left  |
| RSd   | Ect   |      |         |      |      |                                         |                        |
| Right | Right | 2.86 | 1078.80 | 0.71 | 2.17 | DMN to another network                  | Intrahemispheric right |
| TeA   | V2L   |      |         |      |      |                                         |                        |
| Right | Right | 3.69 | 354.00  | 0.72 | 2.20 | No                                      | Intrahemispheric right |
| AIP   | GI    |      |         |      |      |                                         |                        |
| Right | Right | 2.91 | 354.00  | 0.72 | 2.20 | No                                      | Intrahemispheric right |
| GI    | AIP   |      |         |      |      |                                         |                        |

Seed and target regions were determined from the NeuroVIISAS tracer database. DMN: Default mode network; AID: agranular insular cortex dorsal part; AIP: agranular insular cortex posterior part; AIV: agranular insular cortex ventral part; Au1: Primary auditory cortex; AuV: Secondary auditory cortex ventral area; Ect: ectohippocampal cortex; FrA: frontal association cortex; GI: granular insular cortex; M1: primary motor cortex; PRh: perirhinal cortex; RSd: Retrosplenial dorsal; S2: secondary somatosensory cortex; TeA: temporal association cortex 1; V1B: primary visual cortex binocular area.

**Table 5: Characteristics of cortical connections in the rat brain with weak meso- and macro-scale structural connectivity and strong functional connectivity.**

| Seed | Target | Neuronal | Diffusion- | Functional | Euclidean | Connection type | Connection type (regional) |
|------|--------|----------|------------|------------|-----------|-----------------|----------------------------|
|------|--------|----------|------------|------------|-----------|-----------------|----------------------------|

|              |               | tracer-based<br>structural<br>connectivity<br>strength | based<br>structural<br>connectivity<br>strength | connectivity<br>strength (Z') | distance (mm) | (network)                                  |                                 |
|--------------|---------------|--------------------------------------------------------|-------------------------------------------------|-------------------------------|---------------|--------------------------------------------|---------------------------------|
| Right<br>S2  | Left<br>GI    | 1.00                                                   | 0.30                                            | 1.14                          | 12.12         | Sensorimotor network to<br>another network | Heterotopic<br>interhemispheric |
| Right<br>DI  | Right<br>mPFC | 1.44                                                   | 0.30                                            | 1.01                          | 6.70          | DMN to another network                     | Intrahemispheric right          |
| Right<br>M1  | Right<br>Au1  | 1.00                                                   | 0.60                                            | 1.00                          | 8.57          | DMN to sensorimotor<br>network             | Intrahemispheric right          |
| Right<br>Au1 | Right<br>M1   | 1.00                                                   | 0.60                                            | 1.00                          | 8.57          | DMN to sensorimotor<br>network             | Intrahemispheric right          |
| Left<br>M1   | Left<br>Au1   | 1.00                                                   | 0.40                                            | 0.99                          | 8.57          | DMN to sensorimotor<br>network             | Intrahemispheric left           |
| Left<br>Au1  | Left<br>M1    | 1.00                                                   | 0.40                                            | 0.99                          | 8.57          | DMN to sensorimotor<br>network             | Intrahemispheric left           |
| Left<br>DI   | Left<br>mPFC  | 1.44                                                   | 0.20                                            | 0.98                          | 6.71          | DMN to another network                     | Intrahemispheric left           |
| Right<br>M1  | Left<br>S1BF  | 1.00                                                   | 0.50                                            | 0.96                          | 9.20          | Within sensorimotor<br>network             | Heterotopic<br>interhemispheric |
| Left<br>GI   | Left<br>mPFC  | 1.43                                                   | 0.20                                            | 0.95                          | 6.84          | DMN to another network                     | Intrahemispheric left           |
| Right<br>GI  | Right<br>mPFC | 1.43                                                   | 0.10                                            | 0.93                          | 6.83          | DMN to another network                     | Intrahemispheric right          |
| Left<br>V1   | Right<br>M2   | 1.00                                                   | 0.20                                            | 0.92                          | 9.63          | Sensorimotor network to<br>another network | Heterotopic<br>interhemispheric |
| Left<br>RSd  | Left<br>AID   | 1.00                                                   | 0.10                                            | 0.90                          | 9.90          | DMN to another network                     | Intrahemispheric left           |
| Right<br>V1  | Left<br>M2    | 1.00                                                   | 0.20                                            | 0.90                          | 9.64          | Sensorimotor network to<br>another network | Heterotopic<br>interhemispheric |
| Right<br>Cg1 | Right<br>AID  | 0.50                                                   | 0.10                                            | 0.89                          | 5.28          | DMN to another network                     | Intrahemispheric right          |
| Left<br>RSd  | Left<br>LO    | 0.50                                                   | 0.10                                            | 0.89                          | 10.65         | Within DMN                                 | Intrahemispheric left           |
| Right<br>Cg1 | Right<br>V1   | 1.00                                                   | 0.50                                            | 0.88                          | 7.72          | DMN to another network                     | Intrahemispheric right          |
| Right<br>S2  | Left<br>AID   | 0.75                                                   | 0.10                                            | 0.87                          | 11.21         | Sensorimotor network to<br>another network | Heterotopic<br>interhemispheric |
| Right<br>LO  | Right<br>V1   | 1.00                                                   | 0.20                                            | 0.86                          | 10.26         | DMN to another network                     | Intrahemispheric right          |
| Left<br>M1   | Right<br>GI   | 1.07                                                   | 0.50                                            | 0.85                          | 9.70          | Sensorimotor network to<br>another network | Heterotopic<br>interhemispheric |

|       |       |      |      |      |      |                         |                        |
|-------|-------|------|------|------|------|-------------------------|------------------------|
| Right | Left  | 1.00 | 0.30 | 0.84 | 8.91 | Sensorimotor network to | Heterotopic            |
| GI    | M2    |      |      |      |      | another network         | interhemispheric       |
| Left  | Left  | 0.50 | 0.10 | 0.83 | 5.28 | DMN to another network  | Intrahemispheric left  |
| Cg1   | AID   |      |      |      |      |                         |                        |
| Left  | Right | 0.50 | 0.20 | 0.82 | 8.60 | DMN to sensorimotor     | Heterotopic            |
| mPFC  | S2    |      |      |      |      | network                 | interhemispheric       |
| Right | Right | 1.00 | 0.30 | 0.81 | 9.92 | DMN to another network  | Intrahemispheric right |
| RSd   | AID   |      |      |      |      |                         |                        |

Seed and target regions were determined from the NeuroVIISAS tracer database. DMN: Default mode network; AID: agranular insular cortex dorsal part; Au1: primary auditory cortex; Cg1: cingulate cortex area 1; DI: dysgranular insular cortex; GI: granular insular cortex; LO: lateral orbital cortex; M1: primary motor cortex; M2: secondary motor cortex; mPFC: medial prefrontal cortex; RSd: retrosplenial dorsal; S1BF: primary somatosensory cortex barrel field; S2: secondary somatosensory cortex; V1: primary visual cortex.
